# Supplementary material
Source: MDPI journal article supplement (https://www.mdpi.com/2313-0105/9/12/595)
Supplement: s1 [file s1]

# Supporting Information

## Percolation Behavior of a Sulfide Electrolyte – Carbon Additive Matrix for Composite Cathodes in All-Solid-State Batteries

Elias Reisacher, Pinar Kaya, Volker Knoblauch

Materials Research Institute Aalen (IMFAA), Aalen University of Applied Sciences,  
Beethovenstraße 1, 73430 Aalen, Germany

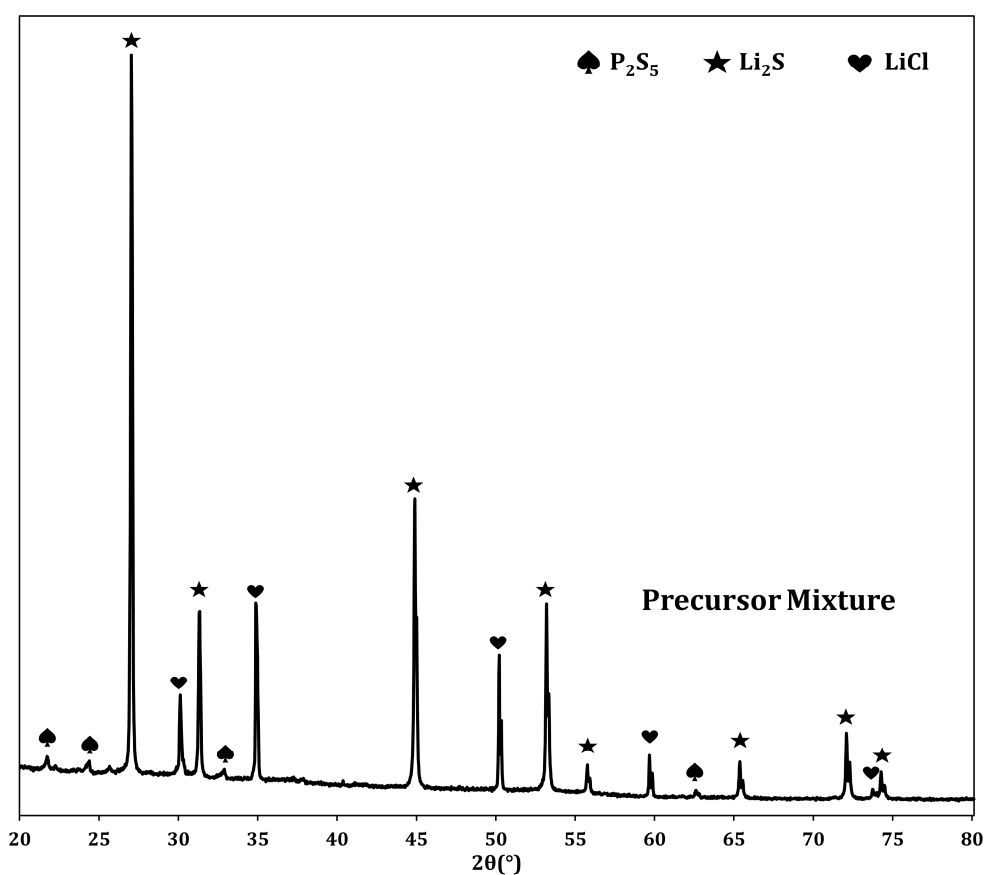

Figure S1: unprocessed XRD Pattern of the precursor mixture.

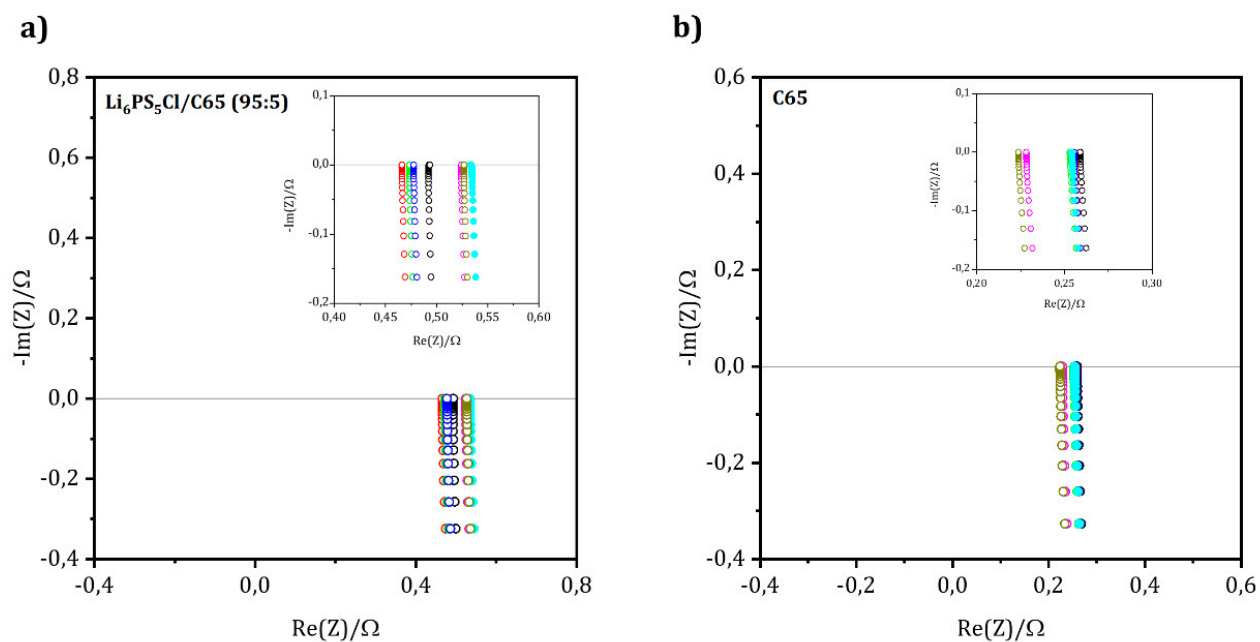

Figure S2: Nyquist plots of the conducting matrix with 5 wt.-% C65 and pure C65 measured between 5 and 65 °C.

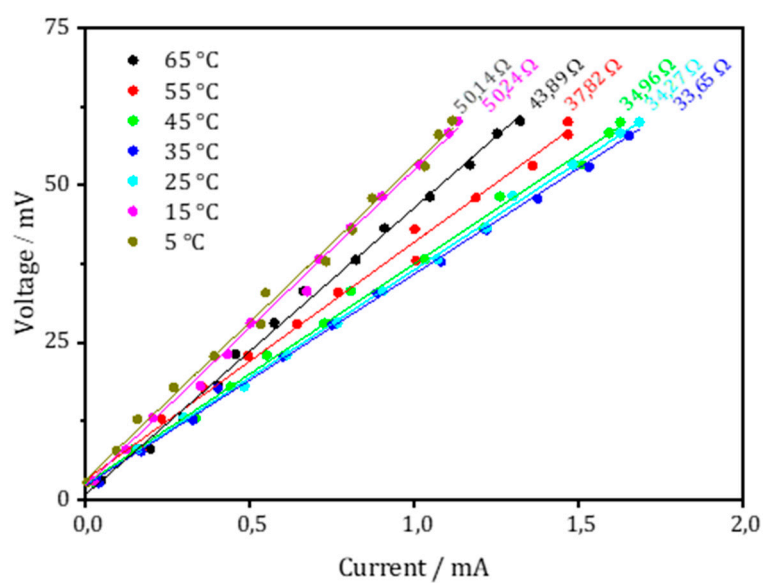

Figure S3: DC measurement of the conducting matrix with 4 wt.-% C65 at temperatures between 5 and 65 °C.

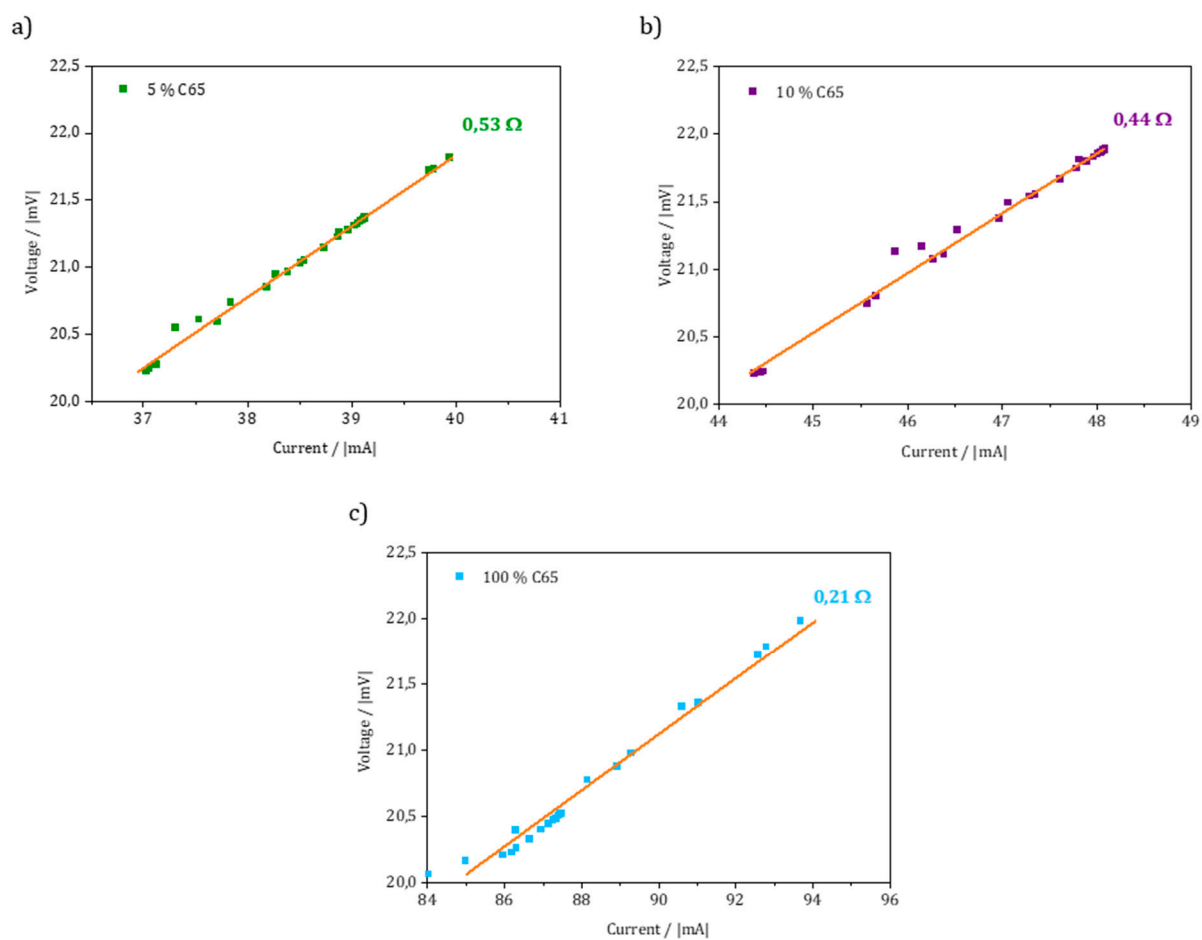

Figure S4: Additional EIS-measurements at RT with C65 fractions above the percolation threshold.

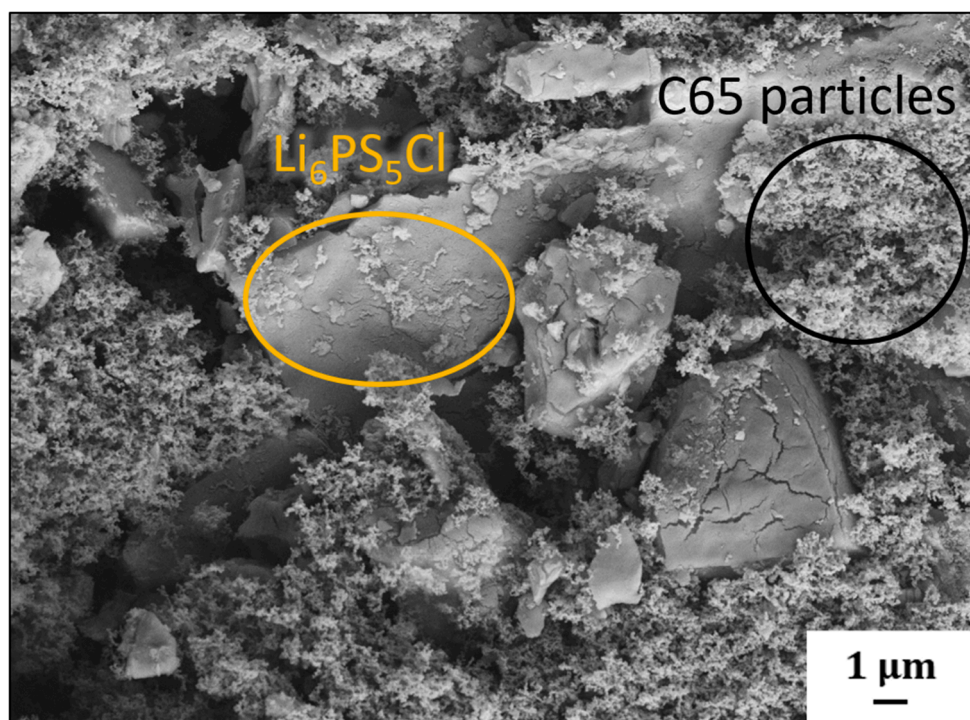

*Figure S5: SE-image of the conducting matrix highlighting the C65 nanoparticles.*
